# Supplementary material
Source: PubMed Central journal article supplement (PMC5766368)

## Supplement 2

### eMethods. Description of radiation dose adaptation

We describe here, in detail, the approach used to adapt treatment. Let  $k_{0h}$ ,  $k_{1h}$  and  $k_{2h}$  denote the ICG 15-minute retention proportions (ICGR15) for patient  $h$  at baseline, mid-treatment and 1 month post fraction 5 (or the planned timepoint for fraction 5 for patients who do not receive fractions 4 and 5). Let  $d_{1h}$  and  $d_{2h}$  denote the SBRT part 1 and part 2 dose per fraction values. At the mid-treatment timepoint for patient  $h$ , the goal was to select  $d_{2h}$  so that  $k_{2h} < .44$  with high probability. The expected value of the final ICGR15 ( $k_{2h}$ ) is given by

$$(1) \quad E[k_{2h}] = k_{1h} + (k_{1h} - k_{0h})(2d_{2h}/3d_{1h})\gamma$$

The term  $(2d_{2h}/3d_{1h})$  captures the difference in dose given during the first and second course of treatment. The unknown parameter  $\gamma$  was included to allow for the possibility that the damage (increase in ICGR15 normalized to dose) during the second course of treatment would be greater than the corresponding damage during the first course. Each time a patient in the trial reached their mid-treatment adaptation point,  $\gamma$  was calculated as described here. Let  $b_{1h} = (k_{1h} - k_{0h})/(3d_{1h})$  and  $b_{2h} = (k_{2h} - k_{1h})/(2d_{2h})$ . The ratios of these sensitivities, denoted as  $r_h = b_{2h}/b_{1h}$ , were assumed to follow a Gaussian( $\mu, \sigma^2$ ) distribution, with priors given by  $\mu \sim \text{Gaussian}(1.5, 0.25)$  and  $\sigma^2 \sim \text{Gamma}(2.5, 0.08)$ . Given the priors and the observed data  $r_i$ ;  $i=1, 2, \dots, h-1$ , the posterior distribution for  $\mu$  and  $\sigma^2$ , and the predictive distribution for future  $r_h$ , are easily calculated. Out of a desire to be conservative,  $\gamma$  in (1) was not estimated by the posterior mean  $\mu$ . Rather it was estimated by the 90<sup>th</sup> percentile of the predictive distribution for  $r_h$  calculated as the median of  $\mu + \Phi^{-1}(0.9)\sigma$ , sampled from the posterior distribution. The algorithm for selecting  $d_{2h}$  for patient  $h$ , was:

- 1) If  $(k_{1h} > .44)$ , then  $d_{2h} = 0$
- 2) If  $(k_{1h} < .44)$  AND  $(k_{1h} < k_{0h})$ , then  $d_{2h} = d_{1h}$
- 3) If  $(k_{0h} < k_{1h} < .44)$ , then  $d_{2h} = \min((0.44 - k_{1h})/(2(\gamma)b_{1h}), d_{1h})$

Note that the first term in the minimum function above is obtained by setting the left hand side of (1) to .44 and solving for  $d_{2h}$ .

**eFigure1.** Tumor dose, with the first part of treatment in blue and the second part of treatment in gold.

**eFigure2.** Predicted and observed change in liver function for all patients after treatment adaptation.

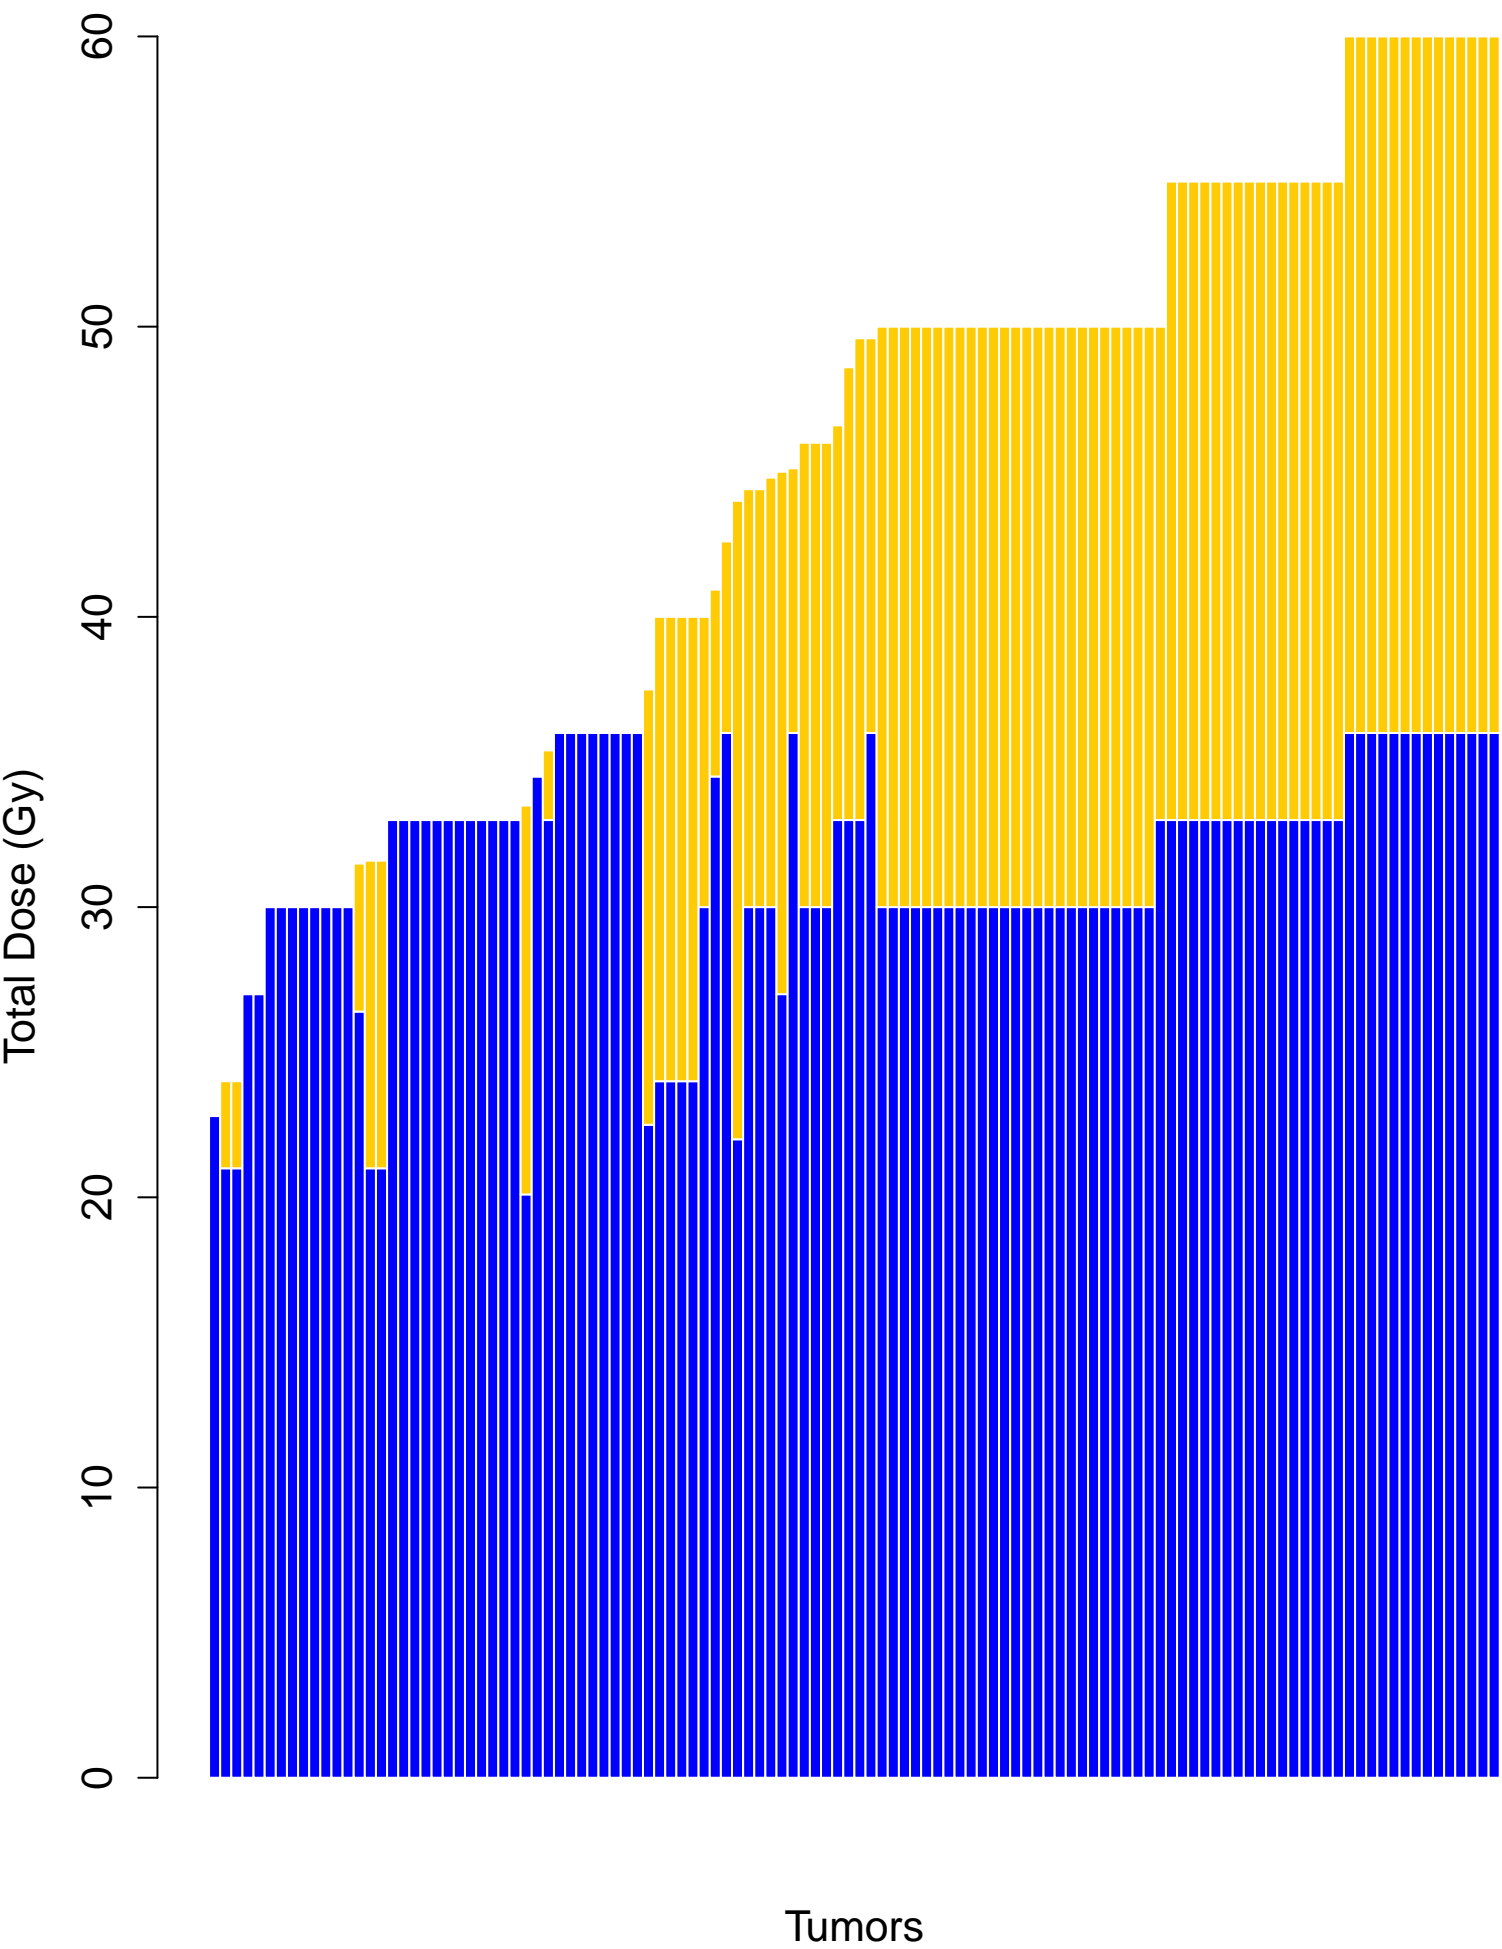

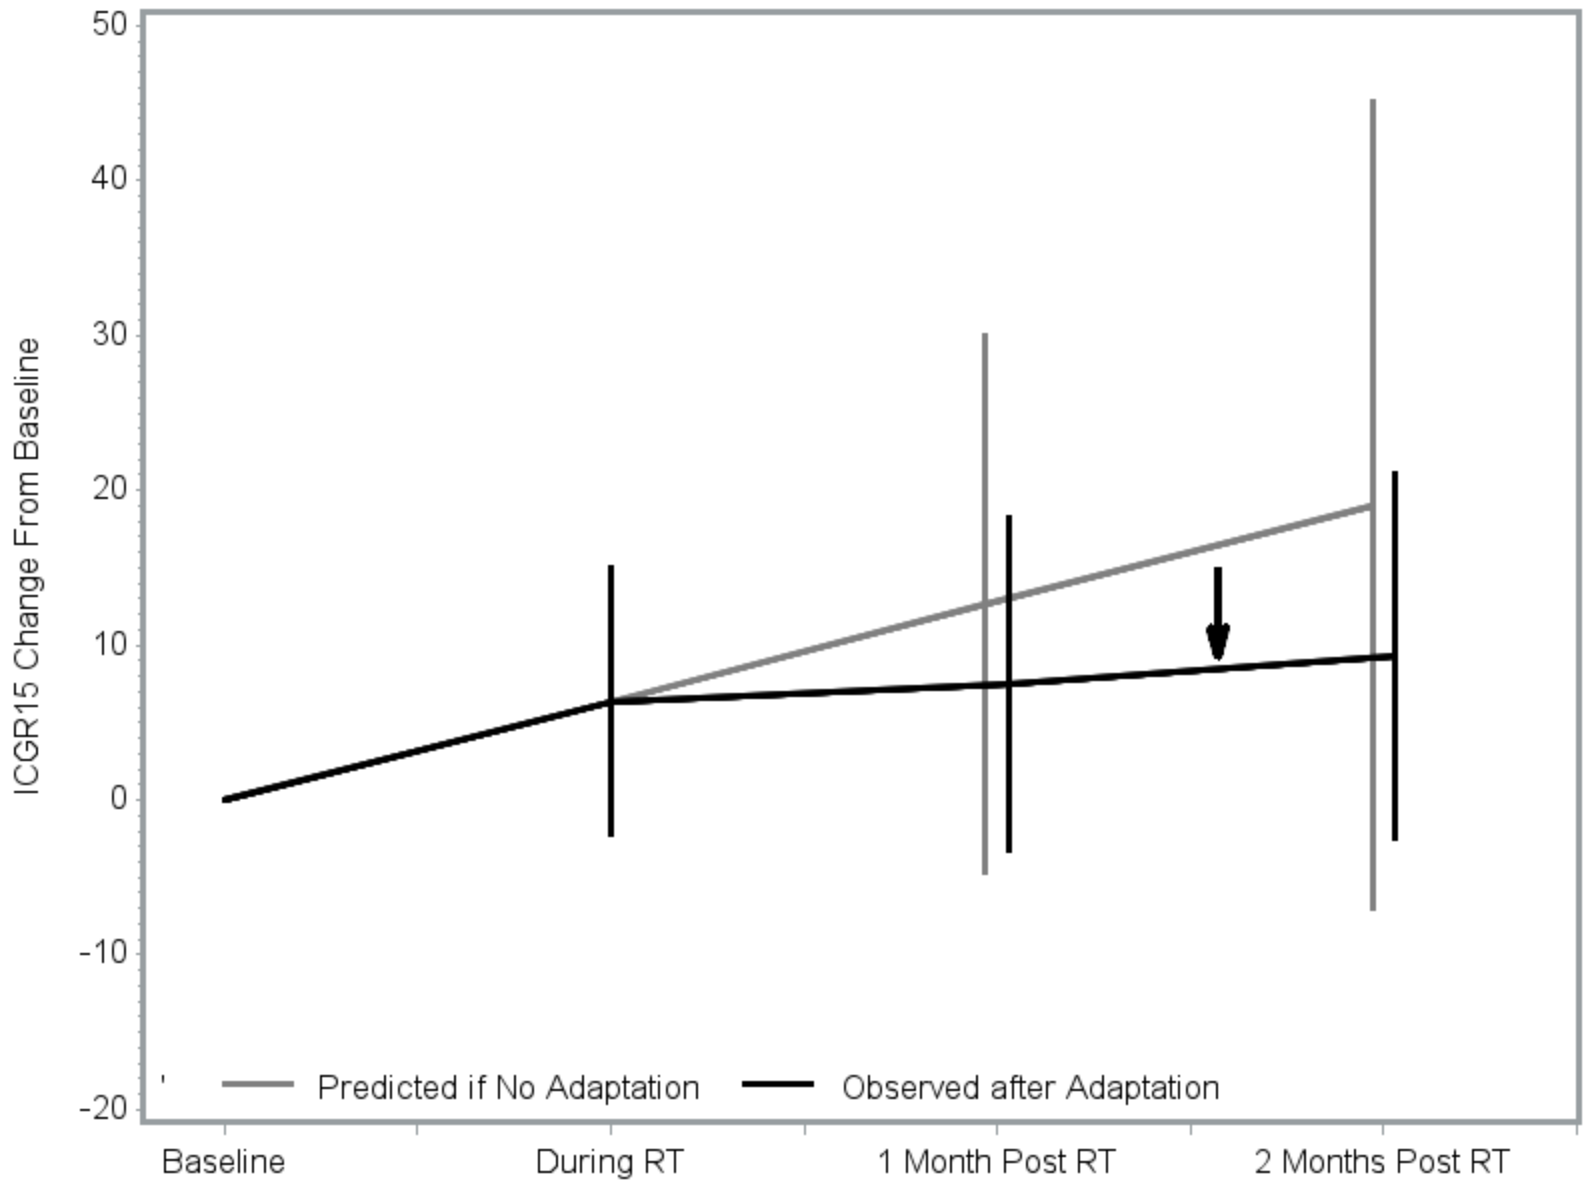

Supplement: NIHMS911063-supplement-Supplement_2.pdf [file NIHMS911063-supplement-Supplement_2.pdf]
